# Supplementary material for: Vibrational spectroscopy of tetrahedral ternary metal hydrides: Mg2NiH4, Rb3ZnH5 and their deuteridesElectronic supplementary information (ESI) available: Force constants for the [ZnH4]2– ion in D2d symmetry (Table S1) and the [NiH4]2– ion in C1 symmetry (Table S2). See http://www.rsc.org/suppdata/cp/b1/b109975b/
Source: Royal Society of Chemistry journal article supplement (doi:10.1039/b109975b), 2002-04-08
Supplement: tables.pdf [file tables.pdf]

**TABLE S1**

Force constants for the  $[\text{ZnH}_4]^{2-}$  ion in  $D_{2d}$  symmetry.

| Value* | Description                                                        |
|--------|--------------------------------------------------------------------|
| 1.130  | Zn-H stretch                                                       |
| -0.049 | Zn-H/Zn-H stretch interaction with $110^\circ$ between bonds       |
| -0.009 | Zn-H/Zn-H stretch interaction with $107^\circ$ between bonds       |
| 0.288  | H-Zn-H bend                                                        |
| -0.097 | Bend interaction where bond angle is $107^\circ$ and $107^\circ$ . |
| -0.015 | Bend interaction where bond angle is $110^\circ$ and $110^\circ$ . |
| -0.012 | Bend interaction where bond angle is $107^\circ$ and $110^\circ$ . |

\*Diagonal force constants have units of  $\text{mdyne}/\text{\AA}^{-1}$  and interaction force constants have units of  $\text{mdyne}/\text{\AA}^{-2}$

All forcefield analysis used a general valence forcefield (GVFF) where the bondlengths and angles are taken from the crystal structures<sup>7,8</sup> (and are also given in the Introduction). Internal coordinates are: bond stretch M-H and bond bending H-M-H. For inclusion of the librational modes, point masses were located around the complex and torsions defined about the M-H bonds. Symmetry coordinates were constructed from the internal coordinates using the in-house program SCORD which uses the conventional projection operator method (see F. A. Cotton, Chemical Applications of Group Theory, Wiley for details). The output from CLIMAX does not include uncertainties in the force constants, however, by varying the force constants manually, it is estimated that the uncertainty is *ca* 5%.

**TABLE S2**

Force constants for the  $[\text{NiH}_4]^{2-}$  ion in  $C_1$  symmetry.

| Value* | Description                                             |
|--------|---------------------------------------------------------|
| 1.670  | Ni-H stretch                                            |
| 0.035  | Ni-H/Ni-H stretch interaction                           |
| 0.235  | H-Ni-H bend                                             |
| -0.081 | Bend interaction where one bond angle includes the long |
|        | (1.5718 $\text{\AA}$ ) bond.                            |
| -0.037 | Bend interaction that does not include the long         |
|        | (1.5718 $\text{\AA}$ ) bond.                            |

\*Diagonal force constants have units of  $\text{mdyne}/\text{\AA}^{-1}$  and interaction force constants have units of  $\text{mdyne}/\text{\AA}^{-2}$
